# Supplementary material for: Atezolizumab: feasible second-line therapy for patients with non-small cell lung cancer? A review of efficacy, safety and place in therapy
Source: PubMed Central journal article supplement — Ther Adv Med Oncol. 2017 Dec 19;9(12):769–79. doi: 10.1177/1758834017741074 (PMC5808842; doi:10.1177/1758834017741074), 2017-12-19
Supplement: Nannini_M_Revised_Suppl_Table_1.pdf [file Nannini_M_Revised_Suppl_Table_1.pdf]

**Supplementary Table 1: Types of personalization strategies adopted in clinical practice, interval between first and second treatment adjustment and overall duration of treatment for each patients**

| Pts code | Starting dose/schedule REG | T * (months) | 1° treatment adjustment | T ** (months) | 2° treatment adjustment          | Reason                 | Duration of treatment (months) |
|----------|----------------------------|--------------|-------------------------|---------------|----------------------------------|------------------------|--------------------------------|
| 01       | 160 mg/day d1-21 e28       | 1,83         | 80 mg/day d1-15 e21     | -             | -                                | Toxicity               | Ongoing                        |
| 02       | 160 mg/day d1-21 e28       | 1,03         | 120 mg/day d1-21 e28    | 2,97          | 80 mg/day d1-5 e9                | Toxicity               | Ongoing                        |
| 03       | 160 mg/day d1-21 e28       | 3,03         | 160 mg/day d1-21 e31    | 5,70          | 120 mg/day d1-5 e9               | Toxicity               | Ongoing                        |
| 04       | 160 mg/day d1-21 e28       | 3,10         | 120 mg/day d1-21 e28    | 45,83         | 80 mg/day d1-21 e28              | Toxicity               | Ongoing                        |
| 05       | 160 mg/day d1-21 e28       | 1,10         | 120 mg/day d1-21 e28    | 1,30          | 120 mg/day d1-5 e9 for 3 wks e28 | Toxicity               | 7,53                           |
| 06       | 160 mg/day d1-21 e28       | 6,37         | 80 mg/day d1-21 e28     | 10,83         | 80 mg/day d1-14 e21              | Toxicity               | Ongoing                        |
| 07       | 160 mg/day d1-21 e28       | 0,60         | 120 mg/day d1-21 e28    | 8,07          | 120 mg/day d1-5 e9 for 3 wks e28 | Toxicity               | 24,97                          |
| 08       | 160 mg/day d1-21 e28       | 8,27         | 120 mg/day d1-21 e28    | -             | -                                | Toxicity               | 11,43                          |
| 09       | 160 mg/day d1-21 e28       | 0,43         | 120 mg/day d1-21 e28    | -             | -                                | Toxicity               | 10,4                           |
| 10       | 160 mg/day d1-21 e28       | 0,93         | 120 mg/day d1-21 e28    | 1,53          | 120 mg/day d1-10 e17             | Toxicity               | 17,67                          |
| 11       | 160 mg/day d1-21 e28       | 1,90         | 160 mg/day d1-5 e9      | 3,73          | 120 mg/day d1-5 e10              | Toxicity               | 6,10                           |
| 12       | 160 mg/day d1-21 e28       | 0,97         | 120 mg/day d1-21 e28    | 1,80          | 120 mg/day d1-14 e21             | Toxicity               | 4,40                           |
| 13       | 160 mg/day d1-21 e28       | 0,46         | 160 mg/die d1-5 e7      | -             | -                                | Toxicity               | 4                              |
| 14       | 160 mg/day d1-21 e28       | 2,3          | 120 mg/day d1-21 e28    | 3,73          | 80 mg/day d1-14 e21              | Toxicity               | 21                             |
| 15       | 160 mg/day d1-21 e28       | 0,46         | 120 mg/day d1-21 e28    | -             | -                                | Toxicity               | 6                              |
| 16       | 160 mg/day d1-21 e28       | 3,3          | 160 mg/day d1-5 e7      | 3,73          | 80mg/day d1-14 e21               | Toxicity               | 17                             |
| 17       | 160 mg/day d1-21 e28       | 0,7          | 160 mg/day d1-5 e7      | -             | -                                | Toxicity               | 4                              |
| 18       | 160 mg/day d1-21 e28       | 0,46         | 120 mg/day d1-21 e28    | -             | -                                | Toxicity               | 3                              |
| 19       | 160 mg/day d1-21 e28       | 0,93         | 160 mg/day d1-5 e7      | 1,6           | 120 mg/day g1-21 e28             | Toxicity               | 12                             |
| 20       | 160 mg/day d1-21 e28       | 1,03         | 120 mg/day d1-21 e28    | -             | -                                | Toxicity               | 3,0                            |
| 21       | 160 mg/day d1-21 e28       | 1,03         | 120 mg/day d1-21 e28    | -             | -                                | Toxicity               | 19                             |
| 22       | 160 mg/day d1-21 e28       | 0,93         | 120 mg/day d1-21 e28    | -             | -                                | Toxicity               | 2                              |
| 23       | 160 mg/day d1-21 e28       | 20,30        | 120 mg/day d1-21 e28    | -             | -                                | Toxicity               | 26                             |
| 24       | 160 mg/day d1-21 e28       | 0,93         | 120 mg/day d1-21 e28    | -             | -                                | Toxicity               | 10                             |
| 25       | 160 mg/day d1-21 e28       | 2,03         | 120 mg/day d1-7 e10     | -             | -                                | Toxicity               | Ongoing                        |
| 26       | 160 mg/day d1-21 e28       | 1,03         | 120 mg/day d1-14 e21    | -             | -                                | Toxicity               | Ongoing                        |
| 27       | 160 mg/day d1-21 e28       | 5,13         | 120 mg/day d1-14 e21/28 | -             | -                                | Toxicity               | 8                              |
| 28       | 160 mg/day d1-21 e28       | 2,57         | 80 mg/day d1-10 e20     | -             | -                                | Toxicity               | 11                             |
| 29       | 160 mg/day d1-21 e28       | 3,50         | 120 mg/day d1-10 e20    | -             | -                                | Toxicity               | 8                              |
| 30       | 160 mg/day d1-21 e28       | 1,00         | 120 mg/day d1-21 e35    | -             | -                                | Toxicity               | 3                              |
| 31       | 160 mg/day d1-21 e28       | 2,37         | 120 mg/day d1-21 e28    | 2,87          | 120 mg/day d1-5 e9               | Toxicity               | Ongoing                        |
| 32       | 160 mg/day d1-21 e28       | 6,87         | 120 mg/day d1-21 e28    | -             | -                                | Toxicity               | 34                             |
| 33       | 160 mg/day d1-21 e28       | 2,07         | 120 mg/day d1-21 e28    | -             | -                                | Toxicity               | 35                             |
| 34       | 160 mg/day d1-21 e28       | 1,60         | 120 mg/day d1-21 e28    | -             | -                                | Toxicity               | 10                             |
| 35       | 160 mg/day d1-21 e28       | 0,30         | 120 mg/day d1-21 e28    | -             | -                                | Toxicity               | 2                              |
| 36       | 160 mg/day d1-21 e28       | 0,60         | 120 mg/day d1-21 e28    | -             | -                                | Toxicity               | 5                              |
| 37       | 160 mg/day d1-21 e28       | 0,57         | 120 mg/day d1-5 e7      | -             | -                                | Toxicity               | 6                              |
| 38       | 160 mg/day d1-21 e28       | 0,60         | 120 mg/day d1-21 e28    | -             | -                                | Toxicity               | 6                              |
| 39       | 160 mg/day d1-21 e28       | 0,23         | 120 mg/day d1-21 e28    | 1,30          | 80 mg/day d1-21 e28              | Toxicity               | 3                              |
| 40       | 160 mg/day d1-21 e28       | 0,90         | 120 mg/day d1-21 e28    | 2,33          | 80 mg/day d1-5 e9                | Toxicity               | Ongoing                        |
| 41       | 160 mg/day d1-21 e28       | 0,97         | 120 mg/day d1-5 e7      | -             | -                                | Toxicity               | 16                             |
| 42       | 160 mg/day d1-21 e28       | 0,43         | 120 mg/day d1-5 e7      | -             | -                                | Toxicity               | 2                              |
| 43       | 160 mg/day d1-21 e28       | 11,7         | 120 mg/day d1-21 e28    | 3,73          | 80 mg/day d1-21 e28              | Toxicity               | 18                             |
| 44       | 160 mg/day d1-21 e28       | 1,03         | 120 mg/day d1-21 e28    | 3,73          | 80 mg/day d1-21 e28              | Toxicity               | Ongoing                        |
| 45       | 160 mg/day d1-21 e28       | 0,50         | 80 mg/day d1-21 e28     | -             | -                                | Toxicity               | 1,5                            |
| 46       | 160 mg/day d1-21 e28       | 0,70         | 120 mg/day d1-21 e28    | 1,17          | 160 mg/day d1-21 e28             | Toxicity (1°); PD (2°) | 5,9                            |
| 47       | 160 mg/day d1-21 e28       | 1,87         | 160 mg/day d1-12 e18    | -             | -                                | Toxicity               | 20,5                           |
| 48       | 160 mg/day d1-21 e28       | 3,90         | 120 mg/day d1-21 e28    | 9,37          | 120 mg/day d1-14 e21             | Toxicity               | 20,8                           |
| 49       | 160 mg/day d1-21 e28       | 3,43         | 120 mg/day d1-21 e28    | -             | -                                | Toxicity               | 7,67                           |
| 50       | 160 mg/day d1-21 e28       | 5,53         | 120 mg/day d1-21 e28    | 17,97         | 160 mg/day d1-21 e28             | Toxicity (1°);         | 35,40                          |

|    |                      |      |                                        |      |                                        | PD (2°)  |         |
|----|----------------------|------|----------------------------------------|------|----------------------------------------|----------|---------|
| 51 | 160 mg/day d1-21 e28 | 2,87 | 120 mg/day d1-9 e11                    | 0,87 | 80 mg/day d1-21 e28                    | Toxicity | 14,97   |
| 52 | 160 mg/day d1-21 e28 | 2,60 | 120 mg/day d1-21 e28                   | -    | -                                      | Toxicity | 4,03    |
| 53 | 160 mg/day d1-21 e28 | 3,43 | 160 mg/day d1-7 e 120 mg/day d8-21 e28 | 6,53 | 160 mg/day d1-7 → 120 mg/day d8-14 e21 | Toxicity | 26,3    |
| 54 | 160 mg/day d1-21 e28 | 1,60 | 120 mg/day d1-21 e28                   | -    | -                                      | Toxicity | 2, 40   |
| 55 | 160 mg/day d1-21 e28 | 5,60 | 120 mg/day d1-21 e28                   | 1,60 | 120 mg/day d1-14 e21                   | Toxicity | 14,47   |
| 56 | 80 mg/day d1-21 e28  | 4,53 | 120 mg/day d1-21 e28                   | -    | -                                      | PD       | Ongoing |
| 57 | 80 mg/day d1-21 e28  | -    | -                                      | -    | -                                      |          | 9,53    |
| 58 | 120 mg/day d1-21 e28 | -    | -                                      | -    | -                                      |          | Ongoing |
| 59 | 160 mg (d1-5 e7)     | 1,4  | 80 mg/day d1-14 e21                    | -    | -                                      | Toxicity | 8       |
| 60 | 160 mg (d1-5 e7)     | 0,93 | 120 mg/day d1-21 e28                   | -    | -                                      | Toxicity | 6       |
| 61 | 120 mg/day d1-21 e28 | 2,97 | 120 mg/day g1-14 e21                   | 5,33 | 120 mg/day d1-21 e28                   |          | 10,60   |
| 62 | 120 mg/day d1-21 e28 | 2,13 | 160 mg/day d1-21 e28                   | -    | -                                      | PD       | 7,90    |

\* Interval between start of REG and 1° treatment adjustment

\*\* Interval between 1° and 2° treatment adjustment
