# Supplementary material for: Atezolizumab: feasible second-line therapy for patients with non-small cell lung cancer? A review of efficacy, safety and place in therapy
Source: PubMed Central journal article supplement — Ther Adv Med Oncol. 2017 Dec 19;9(12):769–79. doi: 10.1177/1758834017741074 (PMC5808842; doi:10.1177/1758834017741074), 2017-12-19
Supplement: Nannini_M_Revised_Suppl_Table_2.pdf [file Nannini_M_Revised_Suppl_Table_2.pdf]

**Supplementary Table 2: impact of first treatment adjustment on REG side effects**

| Type of first treatment adjustment | N° pts | Impact on side effects                                                  | N° of pts who underwent 2° treatment adjustment |
|------------------------------------|--------|-------------------------------------------------------------------------|-------------------------------------------------|
| 120 mg/day d1-21 e28               | 35     | Complete resolution (6)<br>Partial resolution (23)<br>No resolution (6) | 14                                              |
| 160 mg/day d1-5 e7                 | 4      | Partial resolution (1)<br>No resolution (3)                             | 2                                               |
| 120 mg/day d1-5 e7                 | 3      | Partial resolution (3)                                                  | -                                               |
| 120 mg/day d1-14 e21               | 3      | Partial resolution (2)<br>No resolution (1)                             | 1 (*)                                           |
| 80 mg/day d1-21 e28                | 2      | Partial resolution (1)<br>No resolution (1)                             | 1                                               |
| 80 mg/day d1-14 e21                | 2      | Complete resolution (2)                                                 | -                                               |
| 80 mg/day d1-10 e20                | 1      | Partial resolution                                                      | -                                               |
| 120 mg/day d1-7g e10               | 1      | Partial resolution                                                      | -                                               |
| 120 mg/day d1-10 e20               | 1      | Complete resolution                                                     | -                                               |
| 120 mg/day d1-21 e35               | 1      | Partial resolution                                                      | -                                               |
| 120 mg/day d1-9 e11                | 1      | Partial resolution                                                      | 1                                               |
| 160 mg/day d1-21 e31               | 1      | Partial resolution                                                      | 1                                               |
| 160 mg/day d1-5 e9                 | 1      | Partial resolution                                                      | 1                                               |
| 160 mg/day d1-12 e18               | 1      | Partial resolution                                                      | -                                               |
| 160 mg/day d1-7 →120 mg d8-21 e28  | 1      | Partial resolution                                                      | 1                                               |

\* increase of dose due to disease progression
