# Supplementary material for: Atezolizumab: feasible second-line therapy for patients with non-small cell lung cancer? A review of efficacy, safety and place in therapy
Source: PubMed Central journal article supplement — Ther Adv Med Oncol. 2017 Dec 19;9(12):769–79. doi: 10.1177/1758834017741074 (PMC5808842; doi:10.1177/1758834017741074), 2017-12-19
Supplement: Nannini_M_Revised_Suppl_Table_3.pdf [file Nannini_M_Revised_Suppl_Table_3.pdf]

**Supplementary Table 3: impact of second treatment adjustment on side effects**

| Type of second treatment adjustment    | N° pts | Impact on side effects                            |
|----------------------------------------|--------|---------------------------------------------------|
| 120 mg/day d1-14 e21                   | 3      | Partial resolution                                |
| 80 mg/day d1-21 e28                    | 5      | Complete resolution (1)<br>Partial resolution (4) |
| 80 mg/day d1-14 e21                    | 3      | Complete resolution (1)<br>Partial resolution (2) |
| 80 mg/day g1-5 e7                      | 2      | Complete resolution (1)<br>Partial resolution (1) |
| 120 mg/day d1-5 e7                     | 2      | Complete resolution (1)<br>Partial resolution (1) |
| 120 mg/day d1-5 e7 for 3 wks e28       | 2      | Complete resolution (1)<br>Partial resolution (1) |
| 120 mg/day d1-10 e17                   | 1      | Complete resolution                               |
| 120 mg/day d1-5 e10                    | 1      | NA                                                |
| 120 mg/day d1-21 e28                   | 1      | Complete resolution                               |
| 160 mg/day d1-7 → 120 mg/day d8-14 e21 | 1      | Partial resolution                                |
